# Supplementary material for: Insights Into Transcriptome Profiles Associated With Wooden Breast Myopathy in Broilers Slaughtered at the Age of 6 or 7 Weeks
Source: Front Physiol. 2021 Jun 28;12:691194. doi: 10.3389/fphys.2021.691194 (PMC8273767; doi:10.3389/fphys.2021.691194)
Supplement: Supplementary file 3 [file Table_3.xlsx]

## Sheet: top pathways (rearranged)
Supplementary Table 3 Top twenty enriched biological pathways associated with developmennt of wooden breast myopathy in 6-week-old commercial broilers suggested by KEGG
KEGG Pathway	Mapped protein	NCBI accession#	Gene ID	Foldchange	NOTE
gga01100 Metabolic pathways (49)	ko:K00011 AKR1B; aldehyde reductase [EC:1.1.1.21]	NM_204629.2	AKR1B10	2.61
	ko:K00251 AKR1D1;aldo-keto reductase family 1, member D1 [EC:1.3.1.3]	NM_001277393.1	AKR1D1	6.55	One more transcirpt variant was matched (FC = 5.74)
	ko:K00274 MAO; monoamine oxidase [EC:1.4.3.4]	XM_416766.5	MAOB	4.85
	ko:K00515 BCMO1; beta-carotene 15,15'-dioxygenase [EC:1.13.11.63]	XM_015292520.1	BCMO1	1.42
	ko:K00613 GATM; glycine amidinotransferase [EC:2.1.4.1]	NM_204745.1	GATM	-3.91	One more transcirpt variant was matched (FC = -3.68)
	ko:K00915 IPMK; inositol-polyphosphate multikinase [EC:2.7.1.140 2.7.1.151]	XM_004942058.2	IPMK	1.64
	ko:K00940 ndk; nucleoside-diphosphate kinase [EC:2.7.4.6]	XM_015295388.1	NME1	2.32
	ko:K01081 E3.1.3.5; 5'-nucleotidase [EC:3.1.3.5]	XM_015281267.1	NT5C3A	-2.25
	ko:K01135 ARSB; arylsulfatase B [EC:3.1.6.12]	XM_003642912.3	ARSB	1.51
	ko:K01136 IDS; iduronate 2-sulfatase [EC:3.1.6.13]	XM_004947130.2	RTEL1	1.4
	ko:K01196 AGL; glycogen debranching enzyme [EC:2.4.1.25 3.2.1.33]	XM_015290749.1	AGL	-1.79
	ko:K01509 ENTPD2; Ectonucleoside triphosphate diphosphohydrolase 2 [EC:3.6.1.3]	NM_204954.2	ENTPD2	-2.33
	ko:K01724 PCBD; 4a-hydroxytetrahydrobiopterin dehydratase [EC:4.2.1.96]	NM_204905.1	PCBD1	1.67
	ko:K01897 ACSL; long-chain acyl-CoA synthetase [EC:6.2.1.3]	XM_015276227.1	ACSL1	-1.71	One more transcirpt variant was matched (FC = -1.67)
	ko:K02377 TSTA3; GDP-L-fucose synthase [EC:1.1.1.271]	NM_001277448.1	TSTA3	1.59
	ko:K11416 SIRT6; NAD+-dependent protein deacetylase sirtuin 6 [EC:2.3.1.286]	NM_001039320.1	SIRT6	1.3
	ko:K11426 SMYD; [histone H3]-lysine4/36 N-trimethyltransferase SMYD [EC:2.1.1.354 2.1.1.357]	NM_204155.1	SMYD1	-1.56
	ko:K13240 NOS1; nitric-oxide synthase, brain [EC:1.14.13.39]	XM_004934480.2	NOS1	-2.01	One more transcirpt variant was matched (FC = -1.98)
	ko:K13510 LPCAT1_2; lysophosphatidylcholine acyltransferase / lyso-PAF acetyltransferase [EC:2.3.1.23 2.3.1.67]	NM_001030568.2	LPCAT2	1.65
	ko:K13513 LCLAT1; lysocardiolipin and lysophospholipid acyltransferase [EC:2.3.1.- 2.3.1.51]	XM_015278084.1	LCLAT1	1.51	One more transcirpt variant was matched (FC = 1.31)
	ko:K13748 MGAT4C; alpha-1,3-mannosylglycoprotein beta-1,4-N-acetylglucosaminyltransferase C [EC:2.4.1.201 2.4.1.145]	XM_015283519.1	MGAT4C	-1.42
	ko:K14634 TIGAR; fructose-2,6-bisphosphatase [EC:3.1.3.46]	XM_417232.5	TIGAR	-2.03
gga04210 Apoptosis (15)	ko:K01363 CTSB; cathepsin B [EC:3.4.22.1]	NM_205371.2	CTSB	2.05
	ko:K04456 AKT; RAC serine/threonine-protein kinase [EC:2.7.11.1]	XM_015283981.1	AKT3	-1.33
	ko:K07374 TUBA; tubulin alpha 1C	XM_015300314.1	LOC100857858	1.75
gga00230 Purine metabolism (15)	ko:K00940 ndk; nucleoside-diphosphate kinase [EC:2.7.4.6]	NM_205325.1	ARF5	1.83
	ko:K01081 E3.1.3.5; 5'-nucleotidase [EC:3.1.3.5]	XM_015281267.1	NT5C3A	-2.25
	ko:K01509 ENTPD2; Ectonucleoside triphosphate diphosphohydrolase 2 [EC:3.6.1.3]	NM_204954.2	ENTPD2	-2.33
gga00240 Pyrimidine metabolism (14)	ko:K00940 ndk; nucleoside-diphosphate kinase [EC:2.7.4.6]	XM_015295388.1	NME1	2.32
	ko:K01081 E3.1.3.5; 5'-nucleotidase [EC:3.1.3.5]	XM_015281267.1	NT5C3A	-2.25
gga04540 Gap junction (13)	ko:K04359 PDGFA; platelet-derived growth factor subunit A	NM_204306.1	PDGFA	-1.45
	ko:K07374 TUBA; tubulin alpha 1C	XM_015300314.1	LOC100857858	1.75
	ko:K17386 PDGFB; platelet-derived growth factor subunit B	XM_015284369.1	PDGFB	-1.52
gga04530 Tight junction (13)	ko:K07199 PRKAB; 5'-AMP-activated protein kinase, regulatory beta subunit	XM_015275335.1	PRKAB1	1.41	One more transcirpt variant was matched (FC = 1.37)
	ko:K07374 TUBA; tubulin alpha 1C	XM_015300314.1	LOC100857858	1.75
gga04145 Phagosome (12)	ko:K07374 TUBA; tubulin alpha 1C	XM_015300314.1	LOC100857858	1.75
	ko:K13240 NOS1; nitric-oxide synthase, brain [EC:1.14.13.39]	XM_004934480.2	NOS1	-2.01	One more transcirpt variant was matched (FC = -1.98)
gga04920 Adipocytokine signaling pathway (10)	ko:K01897 ACSL; long-chain acyl-CoA synthetase [EC:6.2.1.3]	XM_015276227.1	ACSL1	-1.71	One more transcirpt variant was matched (FC = -1.67)
	ko:K04456 AKT; RAC serine/threonine-protein kinase [EC:2.7.11.1]	XM_015283981.1	AKT3	-1.33
	ko:K07199 PRKAB; 5'-AMP-activated protein kinase, regulatory beta subunit	XM_015275335.1	PRKAB1	1.41	One more transcirpt variant was matched (FC = 1.37)
gga00760 Nicotinate and nicotinamide metabolism (9)	ko:K01081 E3.1.3.5; 5'-nucleotidase [EC:3.1.3.5]	XM_015281267.1	NT5C3A	-2.25
	ko:K11416 SIRT6; NAD+-dependent protein deacetylase sirtuin 6 [EC:2.3.1.286]	NM_001039320.1	SIRT6	1.3
gga04510 Focal adhesion (9)	ko:K04359 PDGFA; platelet-derived growth factor subunit A	NM_204306.1	PDGFA	-1.45
	ko:K04456 AKT; RAC serine/threonine-protein kinase [EC:2.7.11.1]	XM_015283981.1	AKT3	-1.33
	ko:K05635 LAMC1; laminin, gamma 1	XM_001234658.4	LAMC1	-1.32
	ko:K06269 PPP1C; serine/threonine-protein phosphatase PP1 catalytic subunit [EC:3.1.3.16]	XM_015272644.1	LOC100858156	-1.36
	ko:K17386 PDGFB; platelet-derived growth factor subunit B	XM_015284369.1	PDGFB	-1.52
gga00790 Folate biosynthesis (8)	ko:K00011 AKR1B; aldehyde reductase [EC:1.1.1.21]	NM_204629.2	AKR1B10	2.61	One more gene was also matched. AKR1BL (NM_001243590.1, FC = 1.49)
	ko:K01724 PCBD; 4a-hydroxytetrahydrobiopterin dehydratase [EC:4.2.1.96]	NM_204905.1	PCBD1	1.67
gga04810 Regulation of actin cytoskeleton (8)	ko:K04275 LPAR4; lysophosphatidic acid receptor 4	NM_001278049.1	LPAR4	-1.43	One more transcirpt variant was matched (FC = -1.48)
	ko:K04359 PDGFA; platelet-derived growth factor subunit A	NM_204306.1	PDGFA	-1.45
	ko:K05757 ARPC1A_B; actin related protein 2/3 complex, subunit 1A/1B	NM_001079495.2	ARPC1A	1.83
	ko:K06269 PPP1C; serine/threonine-protein phosphatase PP1 catalytic subunit [EC:3.1.3.16]	XM_015272644.1	LOC100858156	-1.36
	ko:K17386 PDGFB; platelet-derived growth factor subunit B	XM_015284369.1	PDGFB	-1.52
gga05132 Salmonella infection (8)	ko:K04456 AKT; RAC serine/threonine-protein kinase [EC:2.7.11.1]	XM_015283981.1	AKT3	-1.33
	ko:K05482 IL18; interleukin 18	NM_204608.1	IL18	2.31
	ko:K05757 ARPC1A_B; actin related protein 2/3 complex, subunit 1A/1B	NM_001079495.2	ARPC1A	1.83
	ko:K09487 HSP90B; heat shock protein 90kDa beta	NM_204289.1	HSP90B1	1.4
	ko:K21954 FYCO1; FYVE and coiled-coil domain-containing protein 1	NM_001045839.2	FYCO1	1.42	One more transcirpt variant was matched (FC = 1.46)
gga04910 Insulin signaling pathway (8)	ko:K04456 AKT; RAC serine/threonine-protein kinase [EC:2.7.11.1]	XM_015283981.1	AKT3	-1.33
	ko:K06269 PPP1C; serine/threonine-protein phosphatase PP1 catalytic subunit [EC:3.1.3.16]	XM_015272644.1	LOC100858156	-1.36
	ko:K07199 PRKAB; 5'-AMP-activated protein kinase, regulatory beta subunit	XM_015275335.1	PRKAB1	1.41	One more transcirpt variant was matched (FC = 1.37)
gga05168 Herpes simplex virus 1 infection (8)	ko:K04456 AKT; RAC serine/threonine-protein kinase [EC:2.7.11.1]	XM_015283981.1	AKT3	-1.33
	ko:K06269 PPP1C; serine/threonine-protein phosphatase PP1 catalytic subunit [EC:3.1.3.16]	XM_015272644.1	LOC100858156	-1.36
	ko:K08056 PDIA3; protein disulfide-isomerase A3 [EC:5.3.4.1]	NM_204110.3	PDIA3	1.52
	ko:K09849 TRAF5; TNF receptor-associated factor 5	XM_015283587.1	TRAF5	1.56	Three more transcirpt variants were matched (FC = 1.56, 1.51, 1.48)
gga00051 Fructose and mannose metabolism (8)	ko:K00011 AKR1B; aldehyde reductase [EC:1.1.1.21]	NM_204629.2	AKR1B10	2.61	One more gene was also matched. AKR1BL (NM_001243590.1, FC = 1.49)
	ko:K02377 TSTA3; GDP-L-fucose synthase [EC:1.1.1.271]	NM_001277448.1	TSTA3	1.59
	ko:K14634 TIGAR; fructose-2,6-bisphosphatase [EC:3.1.3.46]	XM_417232.5	TIGAR	-2.03
gga00561 Glycerolipid metabolism (7)	ko:K00011 AKR1B; aldehyde reductase [EC:1.1.1.21]	NM_204629.2	AKR1B10	2.61	One more gene was also matched. AKR1BL (NM_001243590.1, FC = 1.49)
	ko:K13513 LCLAT1; lysocardiolipin and lysophospholipid acyltransferase [EC:2.3.1.- 2.3.1.51]	XM_015278084.1	LCLAT1	1.51	One more transcirpt variant was matched (FC = 1.31)
gga04261 Adrenergic signaling in cardiomyocytes (7)	ko:K04456 AKT; RAC serine/threonine-protein kinase [EC:2.7.11.1]	XM_015283981.1	AKT3	-1.33
	ko:K06269 PPP1C; serine/threonine-protein phosphatase PP1 catalytic subunit [EC:3.1.3.16]	XM_015272644.1	LOC100858156	-1.36
	ko:K10373 TPM1; tropomyosin 1	XM_015278785.1	TPM1	-1.94
gga04371 Apelin signaling pathway (7)	ko:K04456 AKT; RAC serine/threonine-protein kinase [EC:2.7.11.1]	XM_015283981.1	AKT3	-1.33
	ko:K04963 RYR3; ryanodine receptor 3	NM_206874.2	RYR3	-1.88
	ko:K07199 PRKAB; 5'-AMP-activated protein kinase, regulatory beta subunit	XM_015275335.1	PRKAB1	1.41	One more transcirpt variant was matched (FC = 1.37)
	ko:K13240 NOS1; nitric-oxide synthase, brain [EC:1.14.13.39]	XM_004934480.2	NOS1	-2.01	One more transcirpt variant was matched (FC = -1.98)
gga04146 Peroxisome (7)	ko:K01897 ACSL; long-chain acyl-CoA synthetase [EC:6.2.1.3]	XM_015276227.1	ACSL1	-1.71	One more transcirpt variant was matched (FC = -1.67)
	ko:K08746 SLC27A2; solute carrier family 27 (fatty acid transporter), member 2 [EC:6.2.1.- 6.2.1.3]	XM_015276227.1	SLC27A2	-1.87
	ko:K13353 PEX11C; peroxin-11C	NM_001006340.1	PEX11G	1.48
gga03320 PPAR signaling pathway (7)	ko:K04504 PPARD; peroxisome proliferator-activated receptor delta	NM_204728.1	PPARD	1.53
	ko:K01897 ACSL1; long-chain-fatty-acid--CoA ligase 1	XM_015276228.1	ACSL1	-1.71	One more transcirpt variant was matched (FC = -1.67)
	ko:K08746 SLC27A2; solute carrier family 27 (fatty acid transporter), member 2 [EC:6.2.1.- 6.2.1.3]	XM_015273266.1	SLC27A2	-1.87
1) The numbers in the parenthesis after the KEGG pathways indicate numbers of hit differentially expressed transcripts associated with wooden breast myopathy recognized and mapped my KEGG
2) Positive foldchange (highlighted in red) indicated increased transcript abundance in wooden breast relative to non-defective muscle samples.
3) Negative foldchange (highlighted in green) indicates decreased transcript abundance in wooden breast relative to non-defective muscle samples.
4) FC = foldchange
