# Supplementary material for: Insights Into Transcriptome Profiles Associated With Wooden Breast Myopathy in Broilers Slaughtered at the Age of 6 or 7 Weeks
Source: Front Physiol. 2021 Jun 28;12:691194. doi: 10.3389/fphys.2021.691194 (PMC8273767; doi:10.3389/fphys.2021.691194)
Supplement: Supplementary file 4 [file Table_4.xlsx]

## Sheet: enriched pathways in 7wk
Supplementary Table 4 Top twenty enriched biological pathways associated with developmennt of wooden breast myopathy in 7-week-old commercial broilers suggested by KEGG
KEGG Pathway	Mapped protein	NCBI accession#	Gene ID	Foldchange	NOTE
gga01100 Metabolic pathways (49)	ko:K00234 SDHA; succinate dehydrogenase (ubiquinone) flavoprotein subunit [EC:1.3.5.1]	NM_001277398.1	SDHA	-1.75
	ko:K00254 DHODH; dihydroorotate dehydrogenase [EC:1.3.5.2]	NM_001006131.2	DHODH	1.69
	ko:K00272 DDO; D-aspartate oxidase [EC:1.4.3.1]	XM_015284573.1	DDO	2.84	One more transcirpt variant was matched (FC = 2.92)
	ko:K00602 purH; phosphoribosylaminoimidazolecarboxamide formyltransferase / IMP cyclohydrolase [EC:2.1.2.3 3.5.4.10]	NM_205178.1	ATIC	2.33
	ko:K00744 MGAT5; alpha-1,3(6)-mannosylglycoprotein beta-1,6-N-acetyl-glucosaminyltransferase [EC:2.4.1.155]	XM_015289924.1	MGAT5	1.32
	ko:K00807 LTC4S; leukotriene-C4 synthase [EC:4.4.1.20]	XM_015293941.1	LTC4SL	-1.99	One more transcirpt variant was matched (FC = -1.82)
	ko:K00820 glmS; glutamine---fructose-6-phosphate transaminase (isomerizing) [EC:2.6.1.16]	NM_001030882.1	GFPT1	1.99
	ko:K00927 PGK; phosphoglycerate kinase [EC:2.7.2.3]	NM_204985.2	PGK1	-1.53
	ko:K01196 AGL; glycogen debranching enzyme [EC:2.4.1.25 3.2.1.33]	XM_015290749.1	AGL	-1.94
	ko:K01509 ENTPD2; adenosinetriphosphatase [EC:3.6.1.3]	NM_204954.2	ENTPD2	-2.66
	ko:K01689 ENO; enolase [EC:4.2.1.11]	NM_204876.1	ENO2	4.39
	ko:K01837 BPGM; bisphosphoglycerate/phosphoglycerate mutase [EC:5.4.2.4 5.4.2.11]	NM_001030768.1	BPGM	-2.11	One more transcirpt variant was matched (FC = -2.04)
	ko:K01900 LSC2; succinyl-CoA synthetase beta subunit [EC:6.2.1.4 6.2.1.5]	NM_001006271.2	SUCLA2	-1.73
	ko:K01940 argG; argininosuccinate synthase [EC:6.3.4.5]	NM_001013395.1	ASS1	2.46
	ko:K03661 ATPeV0B; V-type H+-transporting ATPase 21kDa proteolipid subunit	NM_001277572.1	ATP6V0B	1.37
	ko:K03844 ALG11; alpha-1,2-mannosyltransferase [EC:2.4.1.131]	NM_001199825.1	ALG11	-2.71
	ko:K03847 ALG12; alpha-1,6-mannosyltransferase [EC:2.4.1.260]	XM_015272591.1	ALG12	1.93	Two more transcript variants were matched (FC = 2.02, 1.94)
	ko:K03954 NDUFA10; NADH dehydrogenase (ubiquinone) 1 alpha subcomplex subunit 10	NM_001031247.1	NDUFA10	-1.54
	ko:K05287 PIGF; GPI ethanolamine phosphate transferase 2/3 subunit F	XM_004935371.2	PIGF	-1.51
	ko:K05304 NANS; sialic acid synthase [EC:2.5.1.56 2.5.1.57 2.5.1.132]	NM_001007975.1	NANS	1.68
	ko:K05605 HIBCH; 3-hydroxyisobutyryl-CoA hydrolase [EC:3.1.2.4]	NM_001031243.1	HIBCH	-1.5
	ko:K07253 MIF; phenylpyruvate tautomerase [EC:5.3.2.1]	NM_001305091.1	MIF	1.93
	ko:K07418 CYP2J; cytochrome P450 family 2 subfamily J [EC:1.14.14.1 1.14.14.73 1.14.14.74 1.14.14.75]	XM_015291174.1	CYP2J22	1.6	Two more transcript variants were matched (FC = 1.56, 1.57)
	ko:K07758 PDXP; pyridoxal phosphatase [EC:3.1.3.74]	XM_003640384.3	PDXP	1.33
	ko:K08047 ADCY7; adenylate cyclase 7 [EC:4.6.1.1]	XM_015292404.1	ADCY7	1.75	Four more transcript variants were matched (FC = 1.75, 1.73, 1.71, 1.62)
	ko:K09661 MGAT5B; mannosyl alpha-1,6-glycoprotein beta-1,6-N-acetyl-glucosaminyltransferase, isozyme B [EC:2.4.1.-]	XM_015295283.1	MGAT5B	1.44
	ko:K09673 CHST9; carbohydrate 4-sulfotransferase 9 [EC:2.8.2.-]	XM_004939813.2	CHST9	1.92	Two more transcript variants were matched (FC = 1.90, 1.86)
	ko:K09680 coaW; type II pantothenate kinase [EC:2.7.1.33]	NM_001244912.1	PANK4	-1.79
	ko:K10703 HACD; very-long-chain (3R)-3-hydroxyacyl-CoA dehydratase [EC:4.2.1.134]	NM_001007828.1	HACD3	1.39
	ko:K12305 ENTPD4; ectonucleoside triphosphate diphosphohydrolase 4 [EC:3.6.1.6]	XM_004947562.2	ENTPD4	-1.31
	ko:K12348 ASAH1; acid ceramidase [EC:3.5.1.23]	NM_001006453.1	ASAH1	1.62
	ko:K12373 HEXA_B; hexosaminidase [EC:3.2.1.52]	NM_001030390.1	HEXB	2.1
	ko:K13800 CMPK1; UMP-CMP kinase [EC:2.7.4.14]	NM_001031564.1	CMPK1	1.55
	ko:K15680 HSD11B1; corticosteroid 11-beta-dehydrogenase isozyme 1 [EC:1.1.1.146]	XM_001235137.4	HSD11B1a	1.8
gga04810 Regulation of actin cytoskeleton (21)	ko:K03099 SOS; son of sevenless	XM_015276737.1	SOS2	-1.47
	ko:K04358 FGF; fibroblast growth factor	NM_001044650.1	FGF16	-2.69
	ko:K05692 ACTG1; actin gamma 1	NM_001007824.2	ACTG1	1.84	One more gene was also matched. LOC776816 (NM_001308613.1, FC = 1.36)
	ko:K05717 FN1; fibronectin 1	NM_001198712.1	FN1	2.68
	ko:K06588 ITGB5; integrin beta 5	NM_204483.1	ITGB5	2.14
	ko:K07831 MRAS; Ras-related protein M-Ras	NM_204489.1	MRAS	3.56
gga04010 MAPK signaling pathway (17)	ko:K03099 SOS; son of sevenless	XM_015276737.1	SOS2	-1.47
	ko:K04358 FGF; fibroblast growth factor	NM_001044650.1	FGF16	-2.69
	ko:K04411 STK4; serine/threonine kinase 4	NM_001030853.1	STK4	1.47
	ko:K05083 ERBB2; receptor tyrosine-protein kinase erbB-2 [EC:2.7.10.1]	NM_001044661.1	ERBB2	-1.48
	ko:K07831 MRAS; Ras-related protein M-Ras	NM_204489.1	MRAS	3.56
gga04141 Protein processing in endoplasmic reticulum (13)	ko:K08056 PDIA3; protein disulfide-isomerase A3 [EC:5.3.4.1]	NM_204110.3	PDIA3	1.52
	ko:K09485 HSP110; heat shock protein 110kDa	NM_001012576.1	HSPA4L	1.52
	ko:K09490 HSPA5; heat shock 70kDa protein 5	NM_205491.1	HSPA5	1.74
	ko:K09521 DNAJC1; DnaJ homolog subfamily C member 1	XM_015282022.1	DNAJC1	-1.34
	ko:K10100 FBXO6; F-box protein 6	XM_015297213.1	FBXO6	1.37
	ko:K13250 SSR2; translocon-associated protein subunit beta	NM_001006561.1	SSR2	1.34	Three more transcript variants were matched (FC = 1.72, 1.72, 1.72)
	ko:K13989 DERL2_3; Derlin-2/3	XM_015295984.1	DERL2	1.35
	ko:K14007 SEC24; protein transport protein SEC24	XM_015276358.1	SEC24D	2.33	Three more transcript variants were matched (FC = 2.25, 2.25, 2.23)
gga04145 Phagosome (12)	ko:K01368 CTSS; cathepsin S [EC:3.4.22.27]	NM_001031345.1	CTSS	2.45
	ko:K03661 ATPeV0B; V-type H+-transporting ATPase 21kDa proteolipid subunit	NM_001277572.1	ATP6V0B	1.37
	ko:K04659 THBS2S; thrombospondin 2/3/4/5	XM_015284053.1	THBS2	15.01	Three more transcript variants were matched (FC = 3.13, 2.96, 2.93)
	ko:K05692 ACTG1; actin beta/gamma 1	NM_001007824.2	ACTG1	1.84	One more gene was also matched. LOC776816 (NM_001308613.1, FC = 1.36)
	ko:K06588 ITGB5; integrin beta 5	NM_204483.1	ITGB5	2.14
	ko:K08012 NCF4; neutrophil cytosolic factor 4	NM_001039272.1	NCF4	1.83
	ko:K10062 COLEC12; collectin sub-family member 12	NM_001039599.1	COLEC12	2.04
gga04510 Focal adhesion (12)	ko:K03099 SOS; son of sevenless	XM_015276737.1	SOS2	-1.47
	ko:K04659 THBS2S; thrombospondin 2/3/4/5	XM_015284053.1	THBS2	15.01	Three more transcript variants were matched (FC = 3.13, 2.96, 2.93)
	ko:K05083 ERBB2; receptor tyrosine-protein kinase erbB-2 [EC:2.7.10.1]	NM_001044661.1	ERBB2	-1.48
	ko:K05692 ACTB_G1; actin beta/gamma 1	NM_001007824.2	ACTG1	1.84	One more gene was also matched. LOC776816 (NM_001308613.1, FC = 1.36)
	ko:K05717 FN1; fibronectin 1	NM_001198712.1	FN1	2.68
	ko:K06588 ITGB5; integrin beta 5	NM_204483.1	ITGB5	2.14
gga04142 Lysosome (10)	ko:K01368 CTSS; cathepsin S [EC:3.4.22.27]	NM_001031345.1	CTSS	2.45
	ko:K01369 LGMN; legumain [EC:3.4.22.34]	XM_015287754.1	LGMN	1.7
	ko:K03661 ATPeV0B; V-type H+-transporting ATPase 21kDa proteolipid subunit	NM_001277572.1	ATP6V0B	1.37
	ko:K04646 CLTC; clathrin heavy chain	XM_004945478.2	CLTCL1	-1.42
	ko:K12305 ENTPD4; ectonucleoside triphosphate diphosphohydrolase 4 [EC:3.6.1.6]	XM_004947562.2	ENTPD4	-1.31
	ko:K12348 ASAH1; acid ceramidase [EC:3.5.1.23]	NM_001006453.1	ASAH1	1.62
	ko:K12373 HEXA_B; hexosaminidase [EC:3.2.1.52]	NM_001030390.1	HEXB	2.1
	ko:K13443 NPC2; Niemann-Pick C2 protein	NM_001031203.1	NPC2	2.2
gga04530 Tight junction (10)	ko:K04354 PPP2R2; serine/threonine-protein phosphatase 2A regulatory subunit B	NM_001030886.1	PPP2R2A	-1.44
	ko:K05083 ERBB2; receptor tyrosine-protein kinase erbB-2 [EC:2.7.10.1]	NM_001044661.1	ERBB2	-1.48
	ko:K05692 ACTB_G1; actin beta/gamma 1	NM_001007824.2	ACTG1	1.84	One more gene was also matched. LOC776816 (NM_001308613.1, FC = 1.36)
	ko:K08367 RUNX1; runt-related transcription factor 1	XM_015299305.1	RUNX1	4.65
gga05164 Influenza A (9)	ko:K04447 JAK2; Janus kinase 2 [EC:2.7.10.2]	XM_015280059.1	JAK2	1.35	One more transcript variants was matched (FC = 1.31)
	ko:K04726 BID; BH3 interacting domain death agonist	NM_204552.2	BID	1.87	One more transcript variants was matched (FC = 1.87)
	ko:K05692 ACTB_G1; actin beta/gamma 1	NM_001007824.2	ACTG1	1.84	One more gene was also matched. LOC776816 (NM_001308613.1, FC = 1.36)
	ko:K05862 VDAC1; voltage-dependent anion channel protein 1	NM_001033869.2	VDAC1	-1.63	One more transcript variants was matched (FC = -1.63)
	ko:K15042 KPNA5_6; importin subunit alpha-6/7	NM_001030774.1	KPNA1	-1.41	One more transcript variants was matched (FC = -1.63)
gga04261 Adrenergic signaling in cardiomyocytes (9)	ko:K04354 PPP2R2; serine/threonine-protein phosphatase 2A regulatory subunit B	NM_001030886.1	PPP2R2A	-1.44
	ko:K08047 ADCY7; adenylate cyclase 7 [EC:4.6.1.1]	XM_015292404.1	ADCY7	1.75	Four more transcript variants were matched (FC = 1.75, 1.73, 1.71, 1.62)
	ko:K09048 CREB3; cyclic AMP-responsive element-binding protein 3	XM_424990.5	CREB3	1.44
gga04144 Endocytosis (8)	ko:K00910 ADRBK; beta-adrenergic-receptor kinase [EC:2.7.11.15]	NM_001031353.1	ADRBK1	-2.75
	ko:K04180 CCR5; C-C chemokine receptor type 5	NM_001271141.1	CCR5	2.09
	ko:K04646 CLTC; clathrin heavy chain	XM_004945478.2	CLTCL1	-1.42
	ko:K15053 CHMP7; charged multivesicular body protein 7	NM_001006306.2	CHMP7	-1.39
	ko:K18462 FAM21; WASH complex subunit FAM21	NM_001012593.2	fam21a	1.3
gga01200 Carbon metabolism (8)	ko:K00234 SDHA; succinate dehydrogenase (ubiquinone) flavoprotein subunit [EC:1.3.5.1]	NM_001277398.1	SDHA	-1.75
	ko:K00927 PGK; phosphoglycerate kinase [EC:2.7.2.3]	NM_204985.2	PGK1	-1.53
	ko:K01689 ENO; enolase [EC:4.2.1.11]	NM_204876.1	ENO2	4.39
	ko:K01900 LSC2; succinyl-CoA synthetase beta subunit [EC:6.2.1.4 6.2.1.5]	NM_001006271.2	SUCLA2	-1.73
	ko:K05605 HIBCH; 3-hydroxyisobutyryl-CoA hydrolase [EC:3.1.2.4]	NM_001031243.1	HIBCH	-1.5
gga04114 Oocyte meiosis (8)	ko:K02602 CPEB; cytoplasmic polyadenylation element-binding protein	XM_004944878.2	CPEB4	-1.36
	ko:K08047 ADCY7; adenylate cyclase 7 [EC:4.6.1.1]	XM_015292404.1	ADCY7	1.75	Four more transcript variants were matched (FC = 1.75, 1.73, 1.71, 1.62)
	ko:K16197 YWHAB_Q_Z; 14-3-3 protein beta/theta/zeta	NM_001006289.1	YWHAB	1.45
gga04060 Cytokine-cytokine receptor interaction (8)	ko:K04180 CCR5; C-C chemokine receptor type 5	NM_001271141.1	CCR5	2.09
	ko:K04182 CCR7; C-C chemokine receptor type 7	NM_001198752.1	CCR7	2.33
	ko:K05057 OSMR; oncostatin M receptor	XM_004937203.2	OSMR	-1.35
	ko:K05082 TPOR; thrombopoietin receptor	NM_001001782.1	MPL	-2.74
	ko:K05154 TNFRSF18; tumor necrosis factor receptor superfamily member 18	NM_001030874.1	TNFRSF18	2.38
	ko:K05512 CCL19; C-C motif chemokine 19	NM_001302168.1	CCL19	3.7
	ko:K16622 BMP8; bone morphogenetic protein 8	XM_003642583.3	BMP8B	2.24
gga03015 mRNA surveillance pathway (7)	ko:K04354 PPP2R2; serine/threonine-protein phosphatase 2A regulatory subunit B	NM_001030886.1	PPP2R2A	-1.44
	ko:K13126 PABPC; polyadenylate-binding protein	XM_015297906.1	PABPC4	-1.61
gga04020 Calcium signaling pathway (6)	ko:K04197 EDNRA; endothelin receptor type A	NM_204119.1	EDNRA	1.82
	ko:K04963 RYR3; ryanodine receptor 3	NM_206874.2	RYR3	-2.09
	ko:K05083 ERBB2; receptor tyrosine-protein kinase erbB-2 [EC:2.7.10.1]	NM_001044661.1	ERBB2	-1.48
	ko:K05862 VDAC1; voltage-dependent anion channel protein 1	NM_001033869.2	VDAC1	-1.63	One more transcript variant was matched (FC = -1.63)
	ko:K08047 ADCY7; adenylate cyclase 7 [EC:4.6.1.1]	XM_015292404.1	ADCY7	1.75	Four more transcript variants were matched (FC = 1.75, 1.73, 1.71, 1.62)
	ko:K16056 ORAI1; calcium release-activated calcium channel protein 1	NM_001030658.1	ORAI1	-1.74
gga03018 RNA degradation (6)	ko:K01689 ENO; enolase [EC:4.2.1.11]	NM_204876.1	ENO2	4.39
	ko:K13126 PABPC; polyadenylate-binding protein	XM_015297906.1	PABPC4	-1.61
gga04210 Apoptosis (6)	ko:K01368 CTSS; cathepsin S [EC:3.4.22.27]	NM_001031345.1	CTSS	2.45
	ko:K04726 BID; BH3 interacting domain death agonist	NM_204552.2	BID	1.87
	ko:K05692 ACTB_G1; actin beta/gamma 1	NM_001007824.2	ACTG1	1.84	One more gene was also matched. LOC776816 (NM_001308613.1, FC = 1.36)
gga04512 ECM-receptor interaction (5)	ko:K04659 THBS2S; thrombospondin 2/3/4/5	XM_015284053.1	THBS2	15.01	Three more transcript variants were matched (FC = 3.13, 2.96, 2.93)
	ko:K05717 FN1; fibronectin 1	NM_001198712.1	FN1	2.68
	ko:K06588 ITGB5; integrin beta 5	NM_204483.1	ITGB5	2.14
gga00520 Amino sugar and nucleotide sugar metabolism (5)	ko:K00820 glmS; glutamine---fructose-6-phosphate transaminase (isomerizing) [EC:2.6.1.16]	NM_001030882.1	GFPT1	1.99
	ko:K05304 NANS; sialic acid synthase [EC:2.5.1.56 2.5.1.57 2.5.1.132]	NM_001007975.1	NANS	1.68
	ko:K12373 HEXA_B; hexosaminidase [EC:3.2.1.52]	NM_001030390.1	HEXB	2.1
1) The numbers in the parenthesis after the KEGG pathways indicate numbers of hit differentially expressed transcripts associated with wooden breast myopathy recognized and mapped my KEGG
2) Positive foldchange (highlighted in red) indicated increased transcript abundance in wooden breast relative to non-defective muscle samples.
3) Negative foldchange (highlighted in green) indicates decreased transcript abundance in wooden breast relative to non-defective muscle samples.
4) FC = foldchange
